# Supplementary material
Source: ML conference proceedings conference paper supplement (https://openreview.net/forum?id=hTW6Bp7VZi)

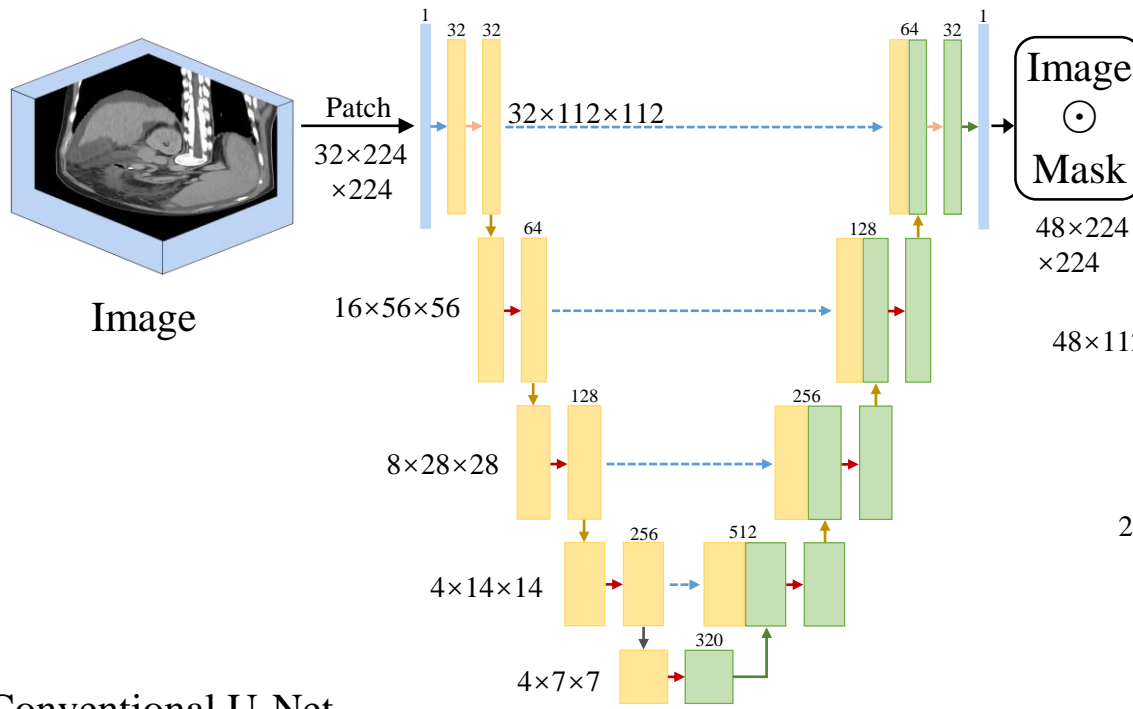

- 3DConv ( $1 \times 3 \times 3$ ,  $1 \times 2 \times 2$ ) → IN → Act  
 → 3DConv ( $1 \times 3 \times 3$ ,  $1 \times 1 \times 1$ ) → IN → Act  
 → 3DConv ( $3 \times 3 \times 3$ ,  $1 \times 2 \times 2$ ) → IN → Act  
 → 3DConv ( $3 \times 3 \times 3$ ,  $2 \times 2 \times 2$ ) → IN → Act  
 → 3DConv ( $3 \times 3 \times 3$ ,  $1 \times 1 \times 1$ ) → IN → Act  
 → 3DConvTrans → IN → Act  
 → Skip Connection

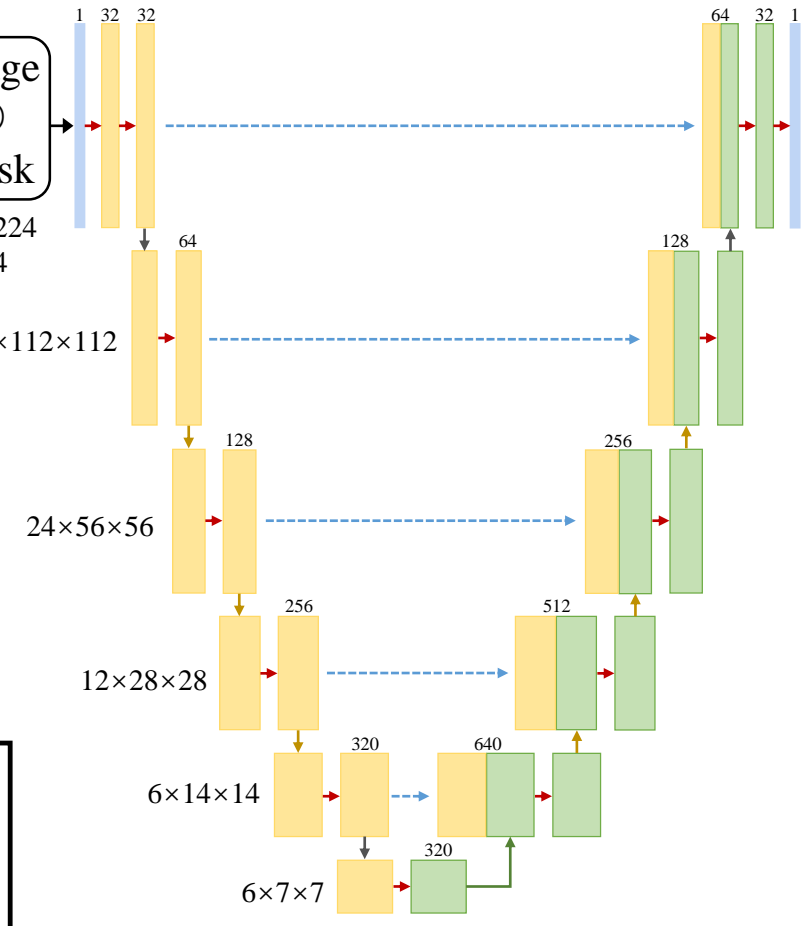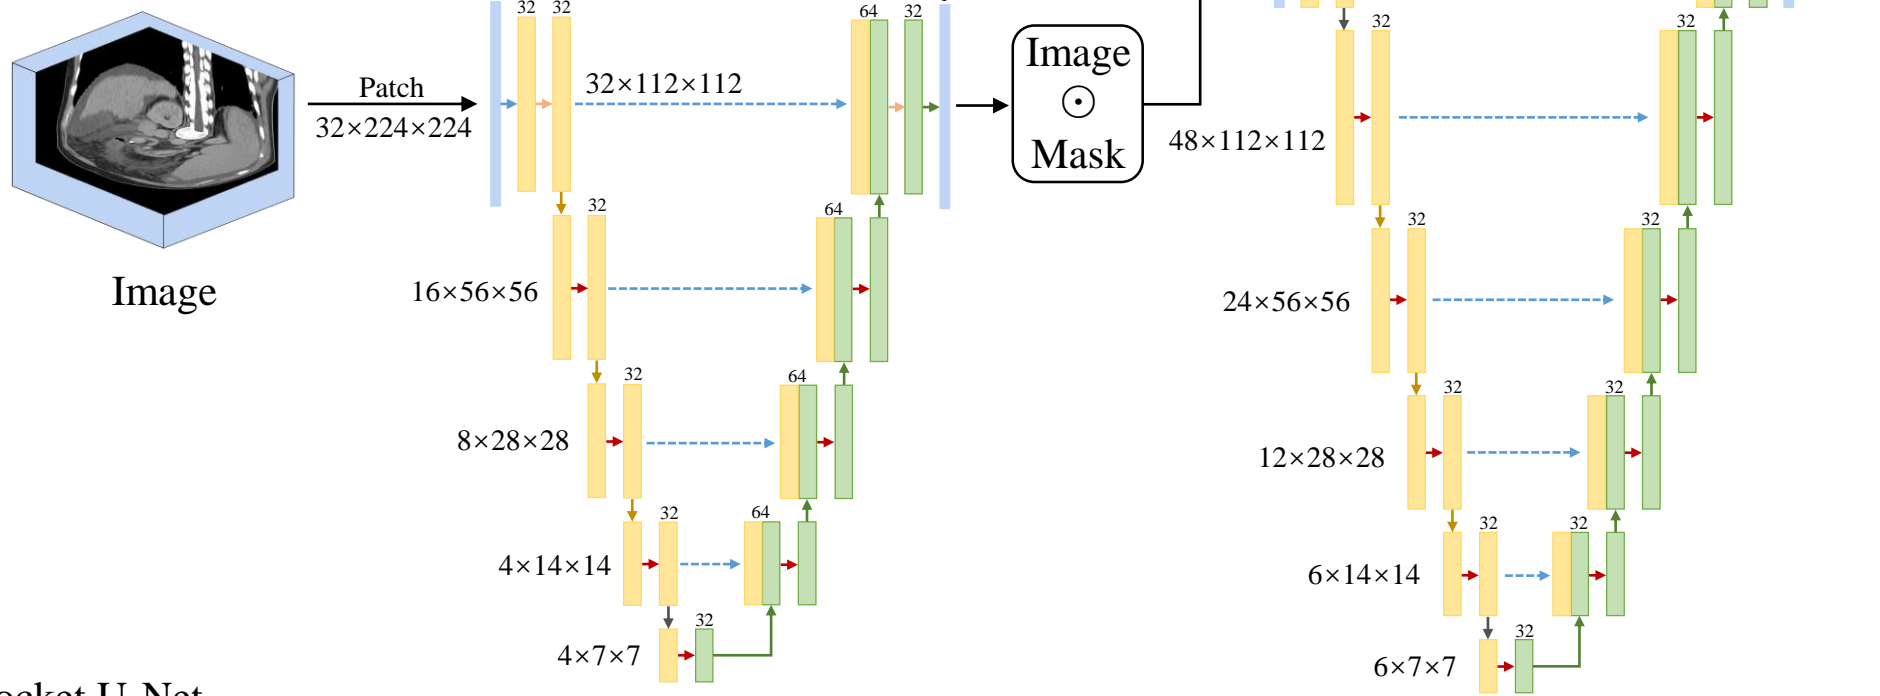

Supplement: supplementary_material [file attachment]
