# Supplementary material
Source: ML conference proceedings conference paper supplement (https://openreview.net/forum?id=hTW6Bp7VZi)
Supplement: supplementary_material [file attachment]

Case #FLARETs\_0007 (slice #63)

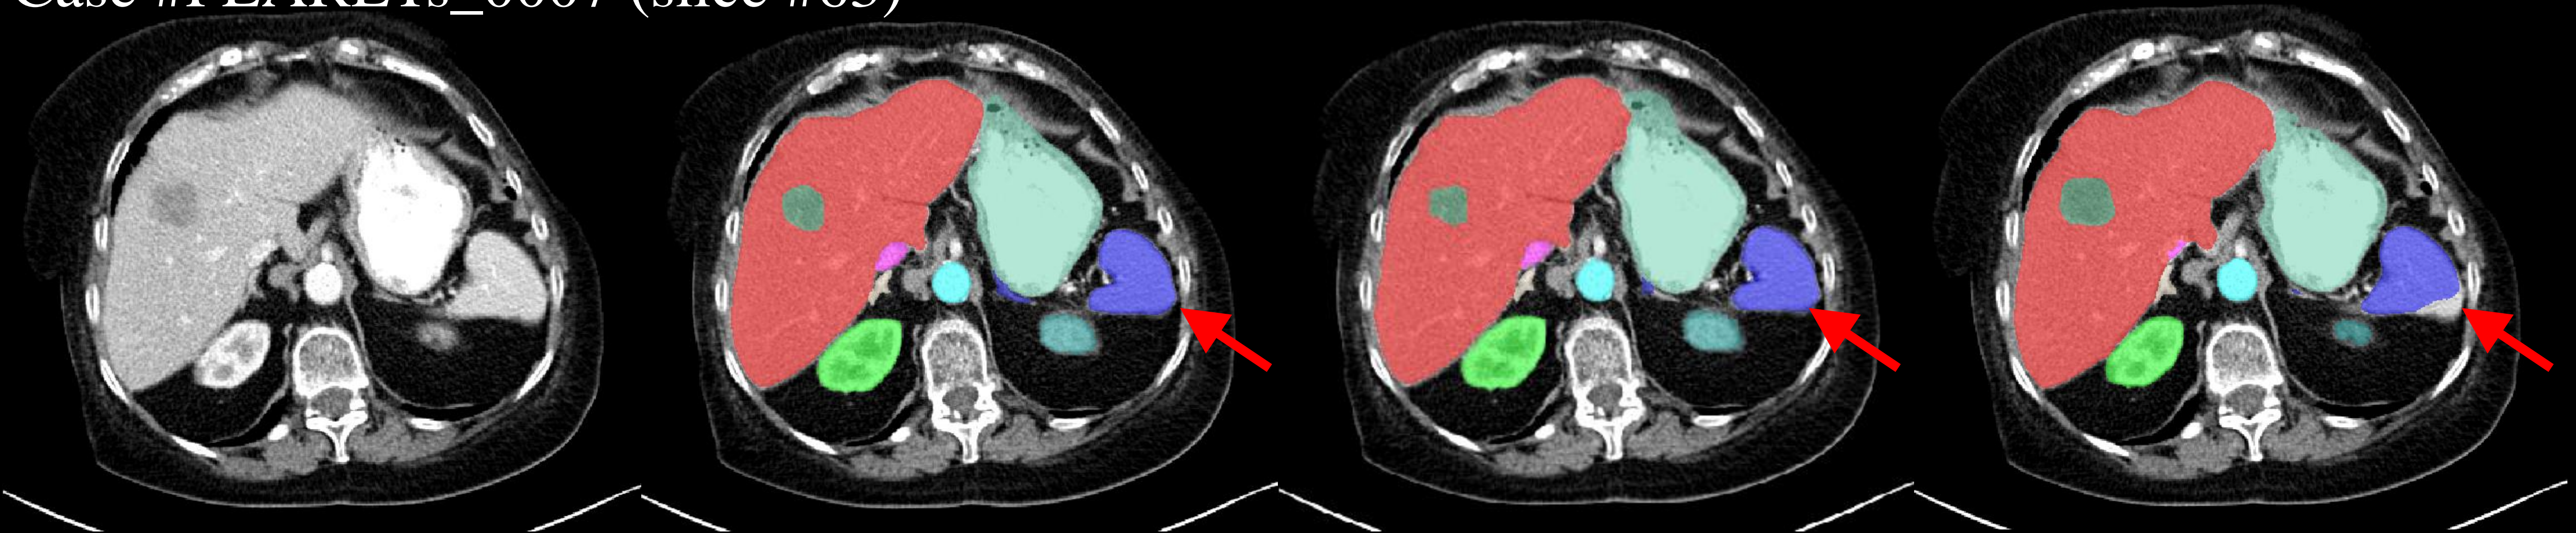

Case #FLARETs\_0038 (slice #177)

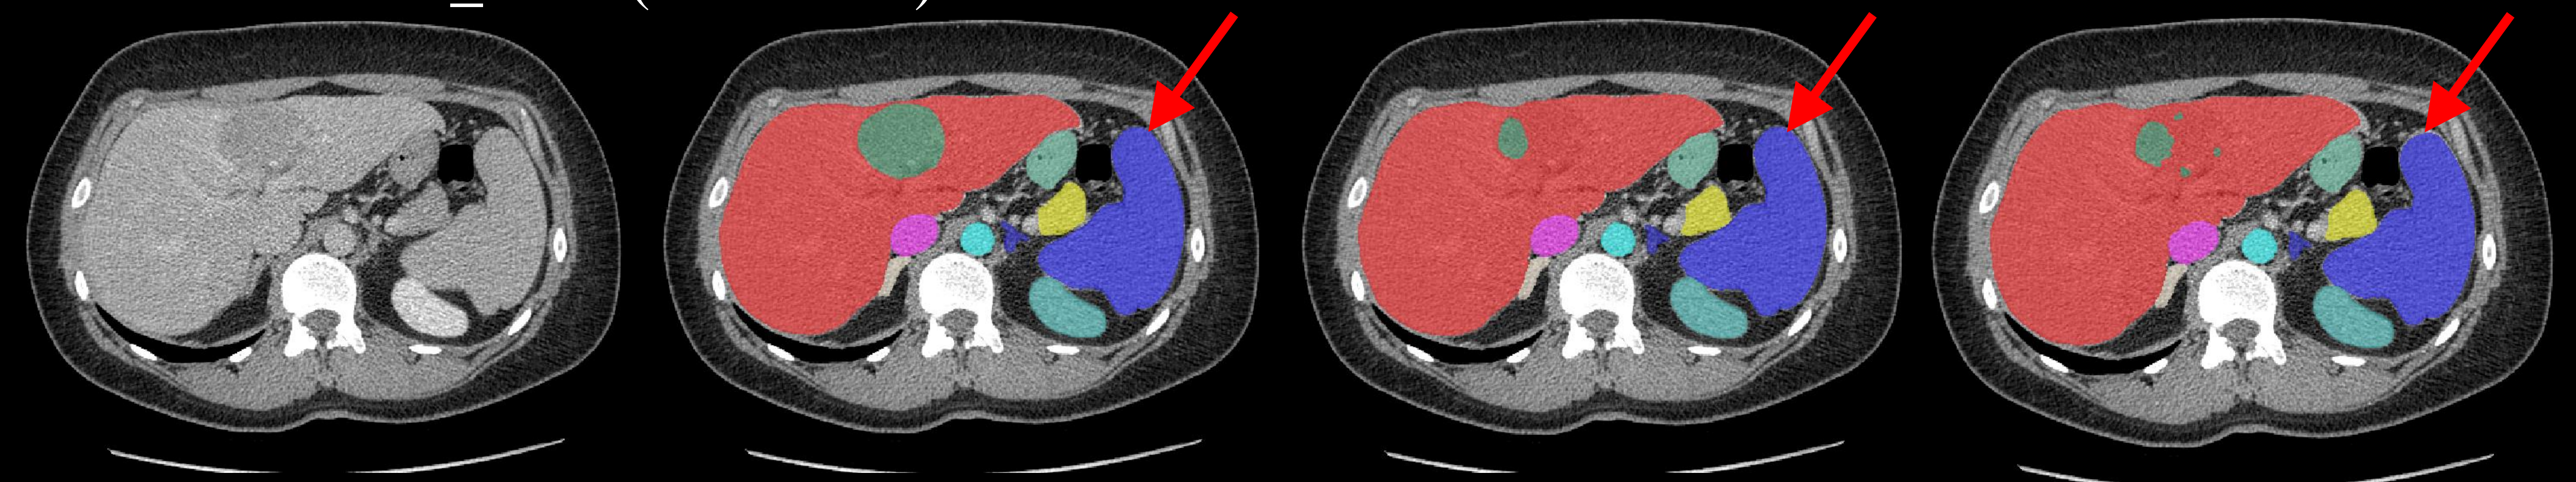

Case #FLARETs\_0075 (slice #65)

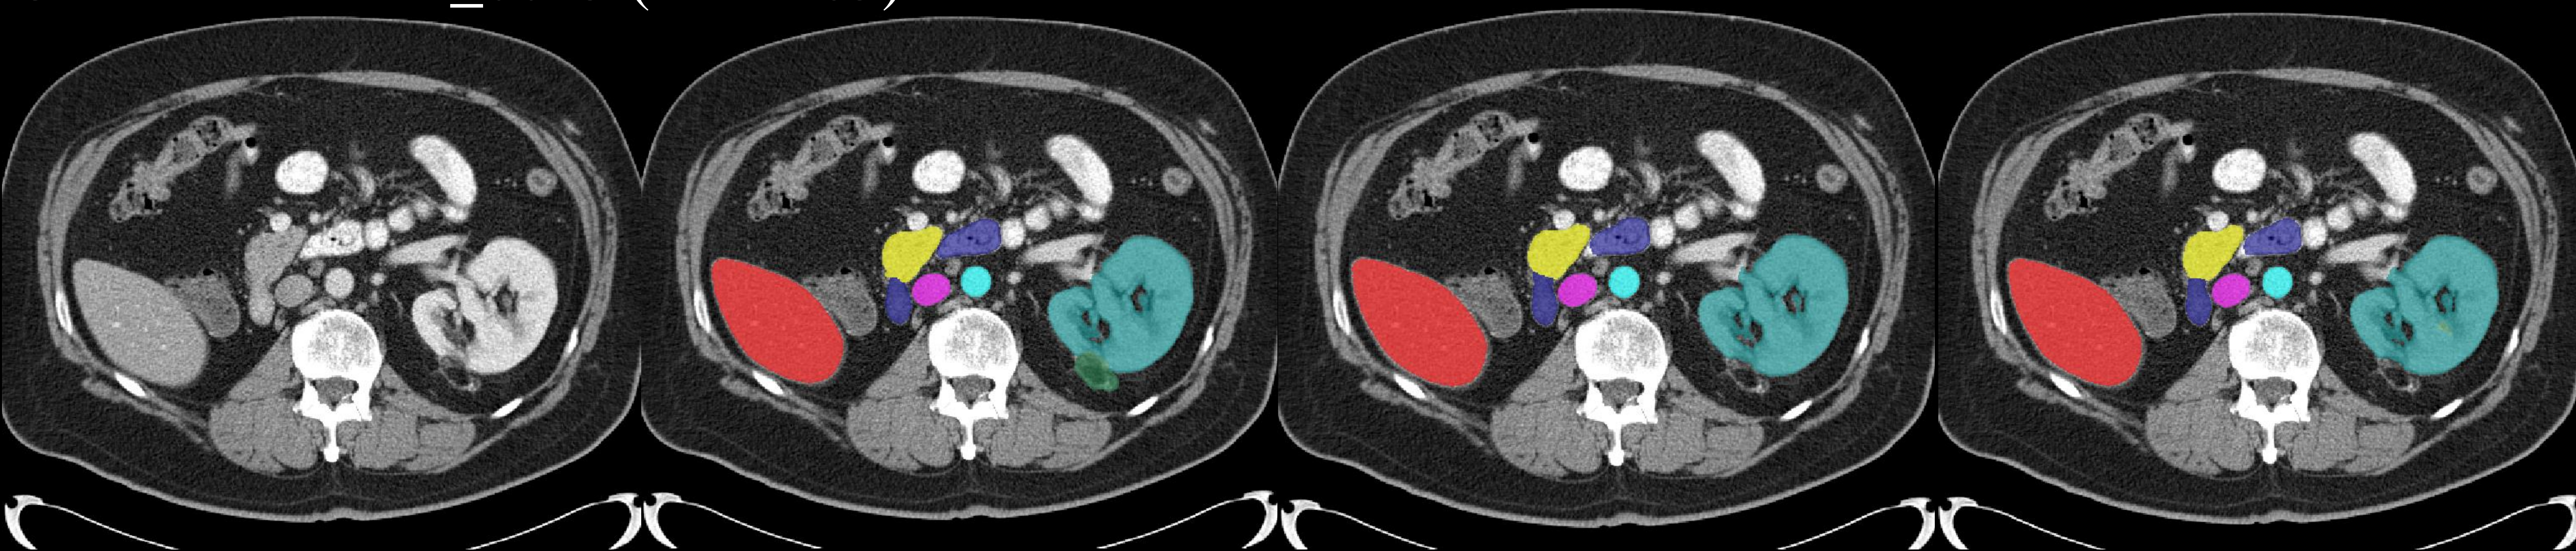

Case #FLARETs\_0089 (slice #67)

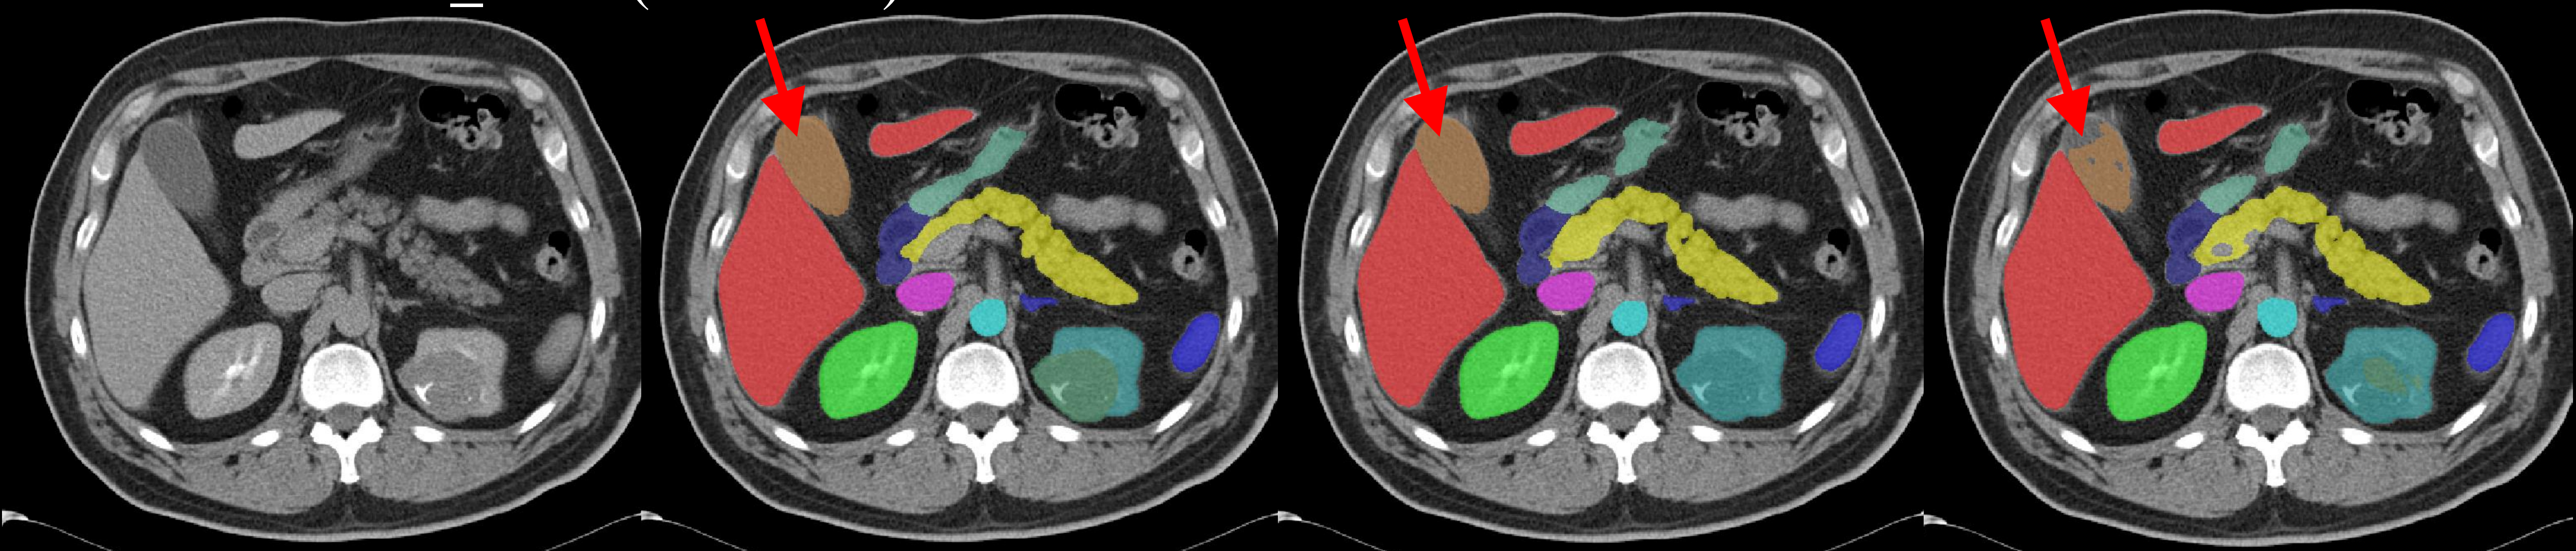

CT Image

Ground Truth

The Proposed Method

W/o Unlabeled Data
